# Supplementary material for: RNA Trans-Splicing Modulation via Antisense Molecule Interference
Source: PubMed Central journal article supplement (PMC5877623; doi:10.3390/ijms19030762), 2018-03-07
Supplement: ijms-19-00762-s001.pdf [file ijms-19-00762-s001.pdf]

# Supplementary Materials:

Figure S1: Prediction of splicing regulators within targeting regions of ASO1-9

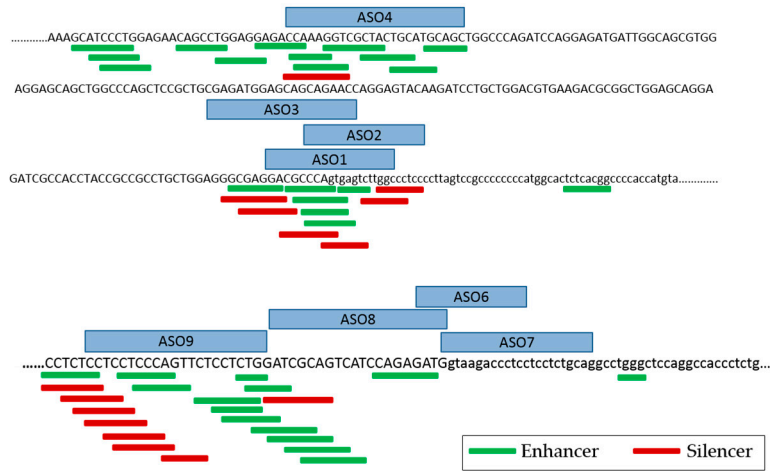

| Designation        | Sequence                                                       | Regulator |
|--------------------|----------------------------------------------------------------|-----------|
| SF2/ASF(IgM) motif | CCGCCAG, GCGAGGA, CCCAGTG                                      | Enhancer  |
| SC35 motif         | GGCCCAGTG, CATCCCTG, GACCAAG, GGTCGCTA, GGTCGCTA, CGCTACTG     | Enhancer  |
| SF2/ASF(IgM)       | CCCCAGTG, CCCTGGA, CAGCCTG, TGGAGGA, TGGAGGA, GAGACCA, CAAAGGT | Enhancer  |
| PESE-Octamers      | ACCCAGTGA, ACCAGTGA                                            | Enhancer  |
| SRp55              | TTGAGTC, AGCATC, TGCAGC, TGCATG                                | Enhancer  |
| ESS motif#3        | AACGCCAG, TGGCCCTC, ACGCCAG                                    | Silencer  |
| ESS motif#2        | AAGTGATC, TCTTGCC, GGCAGGA, CGAGGACG                           | Silencer  |
| SRp40 motif        | TCCCTGG, CCAAAG, CCAAAGG, CTACTGC                              | Enhancer  |
| ESS motif#1        | GCGGAGG, CCAAAGGT                                              | Silencer  |

Figure S2: Agarose gel electrophoresis

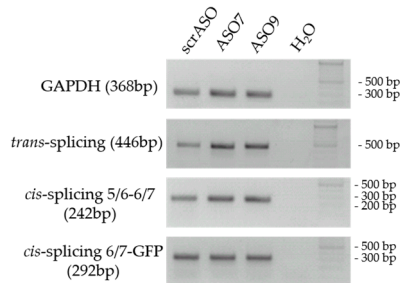

Figure S3: Prediction of splicing regulators within asRNA34 targeting region

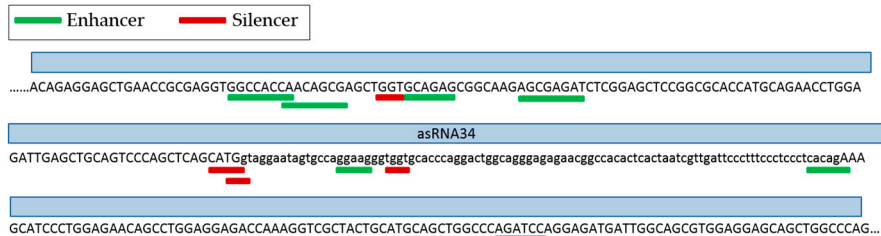

| Designation       | Sequence                     | Regulator |
|-------------------|------------------------------|-----------|
| R0612 (ESE-SC35)  | GGCCACCA                     | Enhancer  |
| R0621 (ESE-SRp40) | TGCAGA, cacagA, TGCAGC       | Enhancer  |
| R0805             | CATGg                        | Silencer  |
| R0815             | ggaag                        | Enhancer  |
| R0836             | AGATCC                       | Silencer  |
| R0910             | GAGCGAGA, GCGAGATG, GCAGGAGA | Enhancer  |
| R0915             | TGGT                         | Silencer  |
| R0935             | CAACAGCG                     | Enhancer  |
